# Supplementary material
Source: Research Square preprint supplement (doi:10.21203/rs.3.rs-9618767/v1)
Supplement: Supplementary file 1 [file 26f87ec4d3a0654f4bfe100b.docx]

Supplementary Material

**Developing and Evaluating an Individualized Antidepressant Treatment Rule:
 A Target Trial Emulation Comparing Treatment Strategies**

**Authors:**

Lukas Westphal1, MSc; Débora D. Gräf1, PhD; Christine E. Hallgreen1, PhD; Morten Andersen2, MD, PhD; Tri-Long Nguyen3, PharmD, PhD;

1 Copenhagen Centre for Regulatory Science, Department of Pharmacy, University of Copenhagen, Denmark

2 Pharmacovigilance Research Group, Department of Drug Design and Pharmacology, University of Copenhagen, Denmark

3 Section of Epidemiology, Department of Public Health, University of Copenhagen, Denmark

**Corresponding Author:**

Lukas Westphal, MSc

***lukas.westphal@sund.ku.dk***

Centre for Regulatory Science

University of Copenhagen

Universitetsparken 2

2100 Copenhagen, Denmark

**Table of Contents**

[**Section A: Figures 3**](#_heading=h.2jn0kmjf14zf)

[eFigure 1: Analysis Flowchart – Phase 1. 3](#_heading=h.uroj85lwtd5i)

[eFigure 2: Analysis Flowchart – Phase 2. 4](#_heading=h.ovhhnmmq7ayv)

[**Section B: Tables 5**](#_heading=h.o7y9bjlfvwnt)

[eTable 1: Target Trial Emulation. 5](#_heading=h.bulzue1hpedh)

[eTable 2: Clinical concepts and their corresponding ICD10 and ATC codes. 8](#_heading=h.9uyujk8wwtdp)

[eTable 3: Baseline Characteristics of Rule Concordant Patients and Sertraline Users. 9](#_heading=h.kklydscbrol7)

[**Section C: Models for Individualized Treatment Effect Estimation 10**](#_heading=h.eo2g0ooanio0)

[1. Outcome Model 10](#_heading=h.873mhzs5405y)

[2. Competing Risk Model 11](#_heading=h.jqqquw6kpy2c)

[3. Variable Definitions 11](#_heading=h.rv3l6nye61pu)

[**Section C: Analysis Code in R 12**](#_heading=h.s4h52w60oqnz)

# Section A: Figures

## eFigure 1: Analysis Flowchart – Phase 1.

## eFigure 2: Analysis Flowchart – Phase 2.

# Section B: Tables

## eTable 1: Target Trial Emulation.

| **Element** | **Target Trial** | **Target Trial Emulation** |
| --- | --- | --- |
| **Eligibility criteria** | Adults with prior inpatient/outpatient depression diagnosis (ICD-10 F32–F33.9), antidepressant-naïve.  Exclusions:   - organic mental disorder - schizophrenia - bipolar disorder - antipsychotic drug use | Adults with prior inpatient/outpatient depression diagnosis (ICD-10 F32–F33.9), antidepressant-naïve.  Exclusions:   - organic mental disorder - schizophrenia - bipolar disorder - recent immigration (<12 months) - antipsychotic drug use - antidepressant polytherapy at initiation   Eligibility based exclusively on baseline registry data. |
| **Treatment strategies** | 1. Sertraline 2. Citalopram 3. Mirtazapine 4. Venlafaxine | Observed initiation of the same four drugs ascertained using prescription data. |
| **Treatment assignment** | Random 1:1:1:1 assignment to one of the treatment strategies.  Open-label design (patients and clinicians aware of treatment). | Observational prescribing. Conditional exchangeability assumed: treatment assignment independent of potential outcomes given measured baseline covariates and their interactions with treatment. Positivity assumed: all patients have non-zero probability of receiving each treatment given their covariate profile. |
| **Start and end of follow-up** | Follow-up starts at randomization (time zero) and ends at outcome, competing event, administrative censoring, or end of follow-up (2 years), whichever comes first. | Index date (time zero) defined as first qualifying antidepressant dispensation.  Follow-up continues until outcome (non-response), competing event, emigration, or 2 years post-index, whichever occurs first.  Competing events: psychiatric admission with bipolar disorder, schizophrenia, or organic mental disorder, and death. |
| **Outcome** | Non-response defined as the earliest occurrence of:   - switch to/augmentation with another antidepressant - antipsychotic medication - inpatient psychiatric hospitalization for depression - Symptom reduction of at least a 50% | Non-response defined as the earliest occurrence of:   - switch to/augmentation with another antidepressant - antipsychotic medication - inpatient psychiatric hospitalization for depression |
| **Estimand**  **and**  **causal contrast** | Intention-to-treat analysis.  The four-arm trial provides data to develop prediction models for heterogeneous treatment effects. These models are used to construct an ITR based on baseline characteristics.  **Estimand**: Population-level reduction in two-year non-response risk under individualized treatment rule (ITR) (where each patient receives the antidepressant associated with their lowest model-predicted risk based on baseline characteristics) compared to universal treatment with sertraline (current standard of care).  **Causal contrasts:** Absolute risk differences and relative risks comparing two allocation strategies: (1) sertraline for all, (2) treatment prescription following ITR.  **Performance metric during model development:** Decision accuracy (difference in non-response rates between patients receiving their ITR-recommended treatment versus alternative treatments). | Intention-to-treat analysis  The four-arm trial provides data to develop prediction models for heterogeneous treatment effects. These models are used to construct an ITR based on baseline characteristics.  **Estimand**: Population-level reduction in two-year non-response risk under individualized treatment rule (ITR) (where each patient receives the antidepressant associated with their lowest model-predicted risk based on baseline characteristics) compared to universal treatment with sertraline (current standard of care).  **Causal contrasts:** Absolute risk differences and relative risks comparing two allocation strategies: (1) sertraline for all, (2) treatment prescription following ITR.  **Performance metric during model development:** Decision accuracy (difference in non-response rates between patients receiving their ITR-recommended treatment versus alternative treatments). |
| **Statistical analysis** | Intention-to-treat.  **Phase 1:** Model Development and Validation  We develop an individualized treatment effect (ITE) model using cause-specific Cox models to predict heterogenous treatment response.  We then validate the ITR model's decision accuracy. Using the randomized trial data, we compare outcomes for patients who, by chance, were assigned their ITR-recommended treatment (concordant) against those assigned a different treatment (discordant). The primary validation metric is the risk difference in 2-year non-response between these groups, estimated using the Aalen-Johansen estimator.  **Phase 2:** Strategy Comparison  We compare the population-level benefit of an ITR versus a universal sertraline strategy (standard of care). Because treatment allocation was randomized, this comparison is direct and does not require propensity score adjustments.   - The outcome for the **universal sertraline strategy** is the 2-year cumulative incidence of non-response, estimated using the Aalen-Johansen estimator on the group randomly assigned to sertraline. No confounding control needed. - The outcome for the **ITR** is a weighted average of the Aalen-Johansen-estimated risks from each randomized treatment arm. The weights are the proportions of patients for whom our ITR recommends each respective treatment.   The risk difference between these two estimates quantifies the benefit of implementing the individualized approach. | Intention-to-treat.  **Phase 1:** Model Development and Validation  We develop a model to estimate individualized treatment effects (ITEs) using cause-specific Cox proportional hazards models, which predict the 2-year risk of non-response for each patient under four different treatments. The model accounts for competing risks (e.g., death, other diagnoses) and confounders are regularized using Ridge. ITR performance is assessed via decision accuracy.  **Phase 2:** Strategy Comparison  We compare the clinical utility of our ITR against a universal sertraline strategy (standard of care). To account for model uncertainty, we use 100 bootstrap iterations.  In each iteration, we redo the same modelling steps from Phase 1 (without cross-validation) on the full cohort. We then use propensity score weighting to estimate the 2-year non-response risk under each of the two strategies. The primary outcome is the risk difference between the strategies, supplemented by the risk ratio and number needed to treat, with 95% confidence intervals derived from the bootstrap distribution. |

## eTable 2: Clinical concepts and their corresponding ICD10 and ATC codes.

| Clinical Concepts | ICD10 codes | ATC codes |
| --- | --- | --- |
| Exclusion criteria and  competing events |  |  |
| Multiple or prior antidepressant use | — | N06A |
| Prior antipsychotic use | — | N05A |
| Bipolar disorder | F30; F31 | — |
| Schizophrenia, schizotypal, delusional, and other non-mood psychotic disorders | F20 to F29 | — |
| Organic mental disorders | F00 to F09; G30 | N04 |
| Confounders |  |  |
| Mood disorders | F34; F38; F39 | — |
| Neurotic and stress-related disorders | F40, F41, F42, F43, F44, F45, F48 | N05B |
| Mental and behavioural disorders due to psychoactive substance use | F10-F19; K70; K711; K712; K86; R780; T51; Z721 | N07BC; N07BA; R03; N07BB |
| Behavioural syndromes associated with physiological disturbances | F50, F51, F52, F53, F54, F55, F59 | — |
| Adult personality and behavioural disorders | F60, F61, F62, F63, F64, F65, F66, F68 | — |
| Cardiovascular disease | G45, G46, I10, I11, I110, I12, I13, I130, I132, I15, I21, I22, I23, I27, I50, I60, I61, I62, I63, I64, I65, I66, I67, I68, I69, I70, I71, I72, I73, I74, I77 | B01AA, B01AC, B01AE, B01AF, C01AA05, C02, C03, C03A, C03C, C07, C08, C08DA01, C08DB01, C09, C10 |
| Hepatic diseases | B150, B160, B162, B18, B190, I85, K700, K701, K702, K703, K704, K709, K71, K72, K73, K74, K760, K766 | — |
| Metabolic diseases | E100, E101, E102, E103, E104, E105, E106, E107, E108, E109, E110, E111, E112, E113, E114, E115, E116, E117, E118, E119, E66, E78 | A08A, A10, A10AD |
| Autoimmune and connective tissue diseases | D86, F454, M05, M06, M08, M09, M30, M31, M32, M33, M34, M35, M36, M79, R52 | — |
| Kidney diseases | I12, I13, N00, N01, N02, N03, N04, N05, N07, N11, N14, N17, N18, N19, Q61 | — |
| Neoplasms (excluding non-melanoma skin cancer, C44) | C00-C26; C30–C34; C37-C41; C43; C45-C58; C60-C85;C88; C90-C96 | — |

## eTable III: Baseline Characteristics of Individualized Treatment Rule (ITR) Concordant Patients and Sertraline Users.

| Variable | ITR-Concordant | Sertraline |
| --- | --- | --- |
| N (%) | 8,033 (45.52) | 2,684 (15.21) |
| Female (%) | 4,544 (56.6) | 1,695 (63.2) |
| Age at index date  (median [IQR]) | 51.23 [28.47, 75.96] | 29.80 [21.39, 43.12] |
| Calendar year of  antidepressant initiation  (median [IQR]) | 2006 [2003, 2010] | 2010 [2004, 2013] |
| Mental and behavioural disorders due to psychoactive substance use (%) | 2,337 (29.1) | 652 (24.3) |
| Neurotic and stress-related disorders (%) | 2,576 (32.1) | 1,157 (43.1) |
| Mood disorders (%) | 18 (0.2) | 16 (0.6) |
| Adult personality and behavioural disorders (%) | 372 (4.6) | 217 (8.1) |
| Behavioural syndromes associated with physiological disturbances (%) | 138 (1.7) | 112 (4.2) |
| Cardiovascular diseases (%) | 4,087 (50.9) | 534 (19.9) |
| Metabolic diseases (%) | 1,461 (18.2) | 207 (7.7) |
| Neoplasms (excluding non-melanoma skin cancer) (%) | 261 (3.2) | 64 (2.4) |
| Hepatic diseases (%) | 83 (1.0) | 22 (0.8) |
| Autoimmune and connective tissue diseases (%) | 372 (4.6) | 134 (5.0) |
| Kidney diseases (%) | 100 (1.2) | 25 (0.9) |

# Section C: Models for Individualized Treatment Effect Estimation

## 1. Outcome Model

The outcome model estimates the hazard of treatment non-response, defined as switching antidepressants, augmenting with another antidepressant, initiating antipsychotic medication, or psychiatric hospitalization for depression.

**1.1 Model Specification**

*The model includes main effects for treatment and all baseline covariates, plus all pairwise treatment-by-covariate interactions to capture treatment effect heterogeneity:*

*ηoutcome,i* = Treatment main effects + Covariate main effects + Treatment × Covariate interactions

*Total: 3 treatment terms + 13 covariate terms + 39 interaction terms = 55 parameters*

*Note: Ridge penalization (L2 regularization) was determined through 10-fold cross-validation.*

**1.2 Estimated Coefficients: Treatment Main Effects**

*β*sertraline = 0.0027

*β*venlafaxine = 0.0799

*β*mirtazapine = 0.1989

**1.3 Estimated Coefficients: Covariate Main Effects**

*β*abuse = 0.0384, *β*anx = 0.2076, *β*cv = -0.0903, *β*db = -0.1584

*β*eat_sl_sx = -0.1167, *β*mood = 0.2313, *β*perso = -0.0159

*β*canc = 0.2370, *β*liver = -0.0889, *β*pain_art = 0.1414

*β*renal = -0.0680, *β*sex = 0.0192, *β*age = -0.0042

**1.4 Estimated Coefficients: Sertraline × Covariate Interactions**

*β*ser×abuse = 0.1296, *β*ser×anx = -0.1475, *β*ser×cv = 0.1867

*β*ser×db = 0.370, *β*ser×eat_sl_sx = 0.0265, *β*ser×mood = -0.7777

*β*ser×perso = 0.0779, *β*ser×canc = -0.1420, *β*ser×liver = 0.0018

*β*ser×pain_art = -0.1444, *β*ser×renal = -0.5128, *β*ser×sex = -0.0077, *β*ser×age = 0.0016

**1.5 Estimated Coefficients: Venlafaxine × Covariate Interactions**

*β*ven×abuse = -0.0639, *β*ven×anx = 0.0279, *β*ven×cv = -0.0159

*β*ven×db = 0.5062, *β*ven×eat_sl_sx = 0.1771, *β*ven×mood = 0.9708

*β*ven×perso = 0.0375, *β*ven×canc = -0.1644, *β*ven×liver = 0.3064

*β*ven×pain_art = -0.1294, *β*ven×renal = 0.0854, *β*ven×sex = 0.0469, *β*ven×age = 0.0002

**1.6 Estimated Coefficients: Mirtazapine × Covariate Interactions**

*β*mir×abuse = -0.0657, *β*mir×anx = 0.0210, *β*mir×cv = -0.0189

*β*mir×db = 0.1638, *β*mir×eat_sl_sx = 0.0808, *β*mir×mood = 0534

*β*mir×perso = 0.1875, *β*mir×canc = -0.0596, *β*mir×liver = 0.1440

*β*mir×pain_art = -0.0161, *β*mir×renal = -0.0830, *β*mir×sex = 0.0869, *β*mir×age = -0.0018

**1.7 Baseline Cumulative Hazard**

*H0,outcome*(2 years) = 0.4542

## 2. Competing Risk Model

The competing risk model estimates the hazard of events that preclude observing non-response: psychiatric admission with bipolar disorder, schizophrenia, organic mental disorder, or death.

**2.1 Model Specification**

*This model includes main effects only (no interactions), adjusted using Firth correction to address sparse events:*

*ηcompeting,i = β*1Tser *+ β*2Tven *+ β*3Tmir *+ β*4Xabuse *+ ... + β*16Xage

*Total: 16 parameters (no interaction terms)*

**2.2 Estimated Coefficients**

*β*1 = -0.1878 (sertraline), *β*2 = -0.0641 (venlafaxine), *β*3 = 0.0428 (mirtazapine)

*β*4 = 0.1526 (abuse), *β*5 = -0.0323 (anxiety), *β*6 = 0.0796 (cardiovascular)

*β*7 = -0.0513 (metabolic), *β*8 = 0.1239 (eating/sleep/sexual), *β*9 = -0.1567 (mood)

*β*10 = 0.0607 (personality), *β*11 = 0.8707 (cancer), *β*12 = 0.1257 (liver)

*β*13 = 0.3348 (autoimmune), *β*14 = 0.4287 (kidney), *β*15 = -0.2860 (sex), *β*16 = 0.0472 (age)

**2.3 Baseline Cumulative Hazard**

*H0,competing*(2 years) = 0.0893

## 3. Variable Definitions

Tsertraline, Tvenlafaxine, Tmirtazapine: Binary treatment indicators (reference: citalopram)

Xabuse: Mental and behavioural disorders due to psychoactive substance use

Xanx_str: Neurotic and stress-related disorders

Xcv: Cardiovascular diseases

Xdb: Metabolic diseases

Xeat_sl_sx: Behavioural syndromes associated with physiological disturbances

Xmood: Mood disorders

Xperso: Adult personality and behavioural disorders

Xcanc: Neoplasms (excluding non-melanoma skin cancer)

Xliver: Hepatic diseases

Xpain_art: Autoimmune and connective tissue diseases

Xrenal: Kidney diseases

Xsex: Sex (binary variable)

Xage: Age at index date (continuous, years)

# Section D: Analysis Code in R

#===============================================================================

# STUDY:

# Developing and Evaluating an Individualized Antidepressant Treatment Rule:

# A Target Trial Emulation Comparing Treatment Strategies

#===============================================================================

# Analysis of individualized treatment effects using Danish registry data

#

# This script performs a two-phase analysis:

# Phase 1: Temporal cross-validation to assess decision accuracy

# Phase 2: Bootstrap comparison of treatment strategies

#

# Author: Lukas Westphal

# Date: August, 2025

#===============================================================================

#===============================================================================

# 0. ENVIRONMENT SETUP

#===============================================================================

# Set locale to English

Sys.setenv(LANG = "en")

Sys.setlocale("LC_TIME", "en_US.UTF-8")

# Load required packages

library(openxlsx)

library(tableone)

library(survminer)

library(survival)

library(dplyr)

library(haven)

library(riskRegression)

library(coxphf)

library(glmnet)

library(prodlim)

library(pec)

library(splines)

library(ggplot2)

library(metamisc)

library(meta)

library(timereg)

library(future)

library(furrr)

library(progressr)

library(grid)

# Set global seed for reproducibility

set.seed(1234)

#===============================================================================

# 1. DATA IMPORT

#===============================================================================

# Define file paths

base_path <- "E:/workdata/707248/ADAPT/"

data_path <- "E:/workdata/707248/ADAPT/Data/"

results_path <- "E:/workdata/707248/ADAPT/Results/"

# Read SAS dataset

analysis3 <- read_sas(paste0(data_path, "analysis3.sas7bdat"))

#===============================================================================

# 2. VARIABLE DEFINITIONS

#===============================================================================

# Time and event variables

time_var <- "cens_time"

outcome_event_var <- "outcome_event"

competing_event_var <- "min_comp_2y_cens"

cens_event_comb_var <- "cens_event_combined"

# Treatment variable

treatment_var <- "treatment"

# Medical comorbidity confounders

confounder_medical <- tolower(c(

"ABUSE_COMB_5y",

"ANX_STR_COMB_5y",

"CV_COMB_5y",

"DB_COMB_5y",

"EAT_SL_SX_DIAG_5y",

"MOOD_DIAG_5y",

"PERSO_DIAG_5y",

"CANC_DIAG_5y",

"LIVER_DIAG_5y",

"PAIN_ART_DIAG_5y",

"RENAL_DIAG_5y"

))

# Sociodemographic confounders

confounder_sociodemo <- c("sex", "age_index")

# Combined confounder set

confounders <- tolower(c(confounder_medical, confounder_sociodemo))

# Index year variable

index_year_var <- "index_year"

#===============================================================================

# 3. DATA MANAGEMENT

#===============================================================================

# Select relevant columns

cols_to_keep <- c(

"person_id", "index_date", "index_year",

"cita_index", "sert_index", "venl_index", "mirt_index",

"depr_diag_1y", "exp_group", "study_end_date", "exit_date",

"death_exit", "study_exit", "migr_exit", "exit_type",

"incl_start_date", "incl_end_date", "study_start_date",

"death_event_date", "migr_event_date", "fu_event_date",

"min_comp_event_date", "comp_outc_event_date",

"min_comp_2y_cens", "comp_outc_2y_cens",

"min_comp_2y_cens_time", "comp_outc_2y_cens_time",

"age_index_year", "age_index", "sex", "age_group",

"age1834", "age3549", "age5064", "age65plus",

"anx_str_drug_5y", "cv_all_drug_5y", "db_meta_drug_5y",

"anx_str_diag_5y", "cv_all_diag_5y", "db_meta_diag_5y",

"eat_sl_sx_diag_5y", "mood_diag_5y", "perso_diag_5y",

"canc_diag_5y", "liver_diag_5y", "pain_art_diag_5y",

"renal_diag_5y", "ABUSE_COMB_5y", "ANX_STR_COMB_5y",

"CV_COMB_5y", "DB_COMB_5y"

)

analysis4 <- analysis3[, cols_to_keep]

names(analysis4) <- tolower(names(analysis4))

# Create treatment factor variable

analysis4 <- analysis4 %>%

mutate(treatment = factor(

exp_group,

levels = 1:4,

labels = c("citalopram", "sertraline", "venlafaxine", "mirtazapine")

))

# Create unified censoring time variable

analysis4$cens_time <- pmin(

analysis4$min_comp_2y_cens_time,

analysis4$comp_outc_2y_cens_time,

na.rm = TRUE

)

# Handle events occurring on the same day (competing events take precedence)

analysis4 <- analysis4 %>%

mutate(

same_day_flag = ifelse(

min_comp_2y_cens == 1 &

comp_outc_2y_cens == 1 &

min_comp_2y_cens_time == comp_outc_2y_cens_time,

1, 0

),

outcome_event = ifelse(same_day_flag == 1, 0, comp_outc_2y_cens)

)

# Create temporal periods for cross-validation

range_dates <- range(analysis4$index_date)

breaks <- seq(from = range_dates[1], to = range_dates[2], length.out = 6)

analysis4$index_periods <- cut(

analysis4$index_date,

breaks = breaks,

labels = paste0("Period_", 1:5)

)

# Create combined event indicator (0 = censored, 1 = outcome, 2 = competing)

analysis4 <- analysis4 %>%

mutate(cens_event_combined = case_when(

get(outcome_event_var) == 1 ~ 1,

get(competing_event_var) == 1 ~ 2,

TRUE ~ 0

))

# Save processed dataset

saveRDS(analysis4, file = paste0(data_path, "Analysis4.rds"))

#===============================================================================

# 4. PROPORTIONAL HAZARDS ASSUMPTION TESTING

#===============================================================================

# Construct formula for Cox regression

rhs <- paste(tolower(c(treatment_var, confounders)), collapse = " + ")

formula_linear <- as.formula(

paste0("Surv(", time_var, ", ", outcome_event_var, ") ~ ", rhs)

)

# Fit Cox model

cox_linear <- coxph(formula_linear, data = analysis4)

# Test proportional hazards assumption

ph_test <- cox.zph(cox_linear)

write.csv(

ph_test$table,

paste0(results_path, "prop_hazards_test.csv"),

row.names = TRUE

)

# Visual assessment of proportional hazards

pdf(paste0(results_path, "schoenfeld_residuals_plot.pdf"), width = 12, height = 8)

plot(ph_test)

dev.off()

cat("Proportional hazards assumption testing completed\n")

#===============================================================================

# 5. ANALYSIS PARAMETERS

#===============================================================================

# Model parameters

max_time <- 730 # 2-year follow-up in days

alpha <- 0 # Ridge penalty for regularization

nfolds <- 10 # Number of folds for cross-validation

# Bootstrap parameters

n_boot <- 100 # Number of bootstrap iterations

n_cores <- 30 # Parallel processing cores

# Propensity score parameters

weight_truncate <- 0.025 # Truncation percentile for extreme weights

time_grid <- seq(0, max_time, by = 30) # Time grid for predictions

#===============================================================================

# 6. HELPER FUNCTIONS

#===============================================================================

#-------------------------------------------------------------------------------

# 6.1 Model Fitting Functions

#-------------------------------------------------------------------------------

fit_outcome_model <- function(data, time_var, outcome_event_var, treatment_var,

confounders, alpha, nfolds, verbose = FALSE) {

# Constructs design matrix with treatment-covariate interactions

# Fits penalized Cox regression with Ridge regularization

formula_interactions <- as.formula(

paste0(

"~ ", treatment_var, " * (",

paste(confounders, collapse = " + "), ")"

)

)

design_matrix <- model.matrix(formula_interactions, data = data)

design_matrix <- design_matrix[, -1] # Remove intercept

# Prepare survival object

y_surv <- Surv(data[[time_var]], data[[outcome_event_var]])

# Determine optimal lambda via cross-validation

cv_model <- cv.glmnet(

x = design_matrix,

y = y_surv,

family = "cox",

alpha = alpha,

nfolds = nfolds

)

optimal_lambda <- cv_model$lambda.min

if (verbose) {

cat("Optimal lambda for outcome model:", optimal_lambda, "\n")

}

# Fit final model with optimal lambda

final_model <- glmnet(

x = design_matrix,

y = y_surv,

family = "cox",

alpha = alpha,

lambda = optimal_lambda

)

# Convert to coxph object for compatibility

coefs <- as.vector(coef(final_model))

names(coefs) <- colnames(design_matrix)

formula_coxph <- as.formula(

paste0(

"Surv(", time_var, ", ", outcome_event_var, ") ~ ",

treatment_var, " * (", paste(confounders, collapse = " + "), ")"

)

)

coxph_model <- coxph(formula_coxph, data = data, init = coefs, control = coxph.control(iter.max = 0))

return(list(

penalized_model = final_model,

coxph_model = coxph_model,

lambda = optimal_lambda,

design_matrix = design_matrix

))

}

fit_competing_model <- function(data, time_var, competing_event_var,

treatment_var, confounders, verbose = FALSE) {

# Fits competing risk model using Firth correction for rare events

formula_competing <- as.formula(

paste0(

"Surv(", time_var, ", ", competing_event_var, ") ~ ",

treatment_var, " * (", paste(confounders, collapse = " + "), ")"

)

)

# Attempt standard Cox regression first

standard_fit <- tryCatch(

{

coxph(formula_competing, data = data)

},

error = function(e) NULL,

warning = function(w) NULL

)

# Use Firth correction if standard model fails or has convergence issues

if (is.null(standard_fit) || !standard_fit$converged) {

if (verbose) {

cat("Using Firth correction for competing risk model\n")

}

competing_model <- coxphf(

formula_competing,

data = data,

pl = TRUE,

firth = TRUE

)

} else {

competing_model <- standard_fit

}

return(competing_model)

}

fit_ite_models <- function(train_data, test_data, time_var, outcome_event_var,

competing_event_var, cens_event_comb_var,

treatment_var, confounders, prediction_time,

alpha, nfolds, verbose = FALSE) {

# Master function to fit ITE models and generate predictions

if (verbose) {

cat("\n--- Fitting ITE Models ---\n")

cat("Training set size:", nrow(train_data), "\n")

cat("Test set size:", nrow(test_data), "\n")

}

# Fit outcome model

outcome_fit <- fit_outcome_model(

data = train_data,

time_var = time_var,

outcome_event_var = outcome_event_var,

treatment_var = treatment_var,

confounders = confounders,

alpha = alpha,

nfolds = nfolds,

verbose = verbose

)

# Fit competing risk model

competing_fit <- fit_competing_model(

data = train_data,

time_var = time_var,

competing_event_var = competing_event_var,

treatment_var = treatment_var,

confounders = confounders,

verbose = verbose

)

# Generate predictions for each treatment option

treatment_levels <- levels(train_data[[treatment_var]])

risk_predictions <- matrix(

NA,

nrow = nrow(test_data),

ncol = length(treatment_levels)

)

colnames(risk_predictions) <- treatment_levels

for (i in seq_along(treatment_levels)) {

tx <- treatment_levels[i]

if (verbose) {

cat("Predicting risks for treatment:", tx, "\n")

}

# Create counterfactual dataset

test_data_tx <- test_data

test_data_tx[[treatment_var]] <- factor(tx, levels = treatment_levels)

# Predict using Aalen-Johansen estimator

aj_pred <- predictRisk(

object = list(

Cause1 = outcome_fit$coxph_model,

Cause2 = competing_fit

),

newdata = test_data_tx,

times = prediction_time,

cause = 1,

product.limit = TRUE

)

risk_predictions[, i] <- aj_pred

}

return(list(

outcome_model_penalized = outcome_fit$penalized_model,

outcome_model_coxph_penalized = outcome_fit$coxph_model,

competing_model = competing_fit,

risk_predictions = risk_predictions,

treatment_levels = treatment_levels

))

}

#-------------------------------------------------------------------------------

# 6.2 Propensity Score Functions

#-------------------------------------------------------------------------------

fit_ps_and_truncate <- function(data, confounders, truncate_percentile = 0.025,

plot_ps_dist = FALSE, plot_weight_dist = FALSE,

verbose = FALSE) {

# Fits propensity scores and applies weight truncation

if (verbose) {

cat("\n--- Fitting Propensity Scores ---\n")

}

# Propensity score for following individualized rule

formula_ps_follow <- as.formula(

paste0("followed_rule ~ ", paste(confounders, collapse = " + "))

)

ps_model_follow <- glm(formula_ps_follow, data = data, family = binomial())

ps_follow <- predict(ps_model_follow, type = "response")

# Propensity score for receiving sertraline

formula_ps_sert <- as.formula(

paste0("received_sertraline ~ ", paste(confounders, collapse = " + "))

)

ps_model_sert <- glm(formula_ps_sert, data = data, family = binomial())

ps_sert <- predict(ps_model_sert, type = "response")

# Calculate IPW weights

ipw_follow <- ifelse(data$followed_rule == 1, 1 / ps_follow, 0)

ipw_sert <- ifelse(data$received_sertraline == 1, 1 / ps_sert, 0)

# Apply truncation

threshold_follow <- quantile(ipw_follow[ipw_follow > 0], truncate_percentile)

threshold_sert <- quantile(ipw_sert[ipw_sert > 0], truncate_percentile)

ipw_follow_trunc <- pmax(ipw_follow, threshold_follow)

ipw_sert_trunc <- pmax(ipw_sert, threshold_sert)

# Add to dataset

data$ps_follow <- ps_follow

data$ps_sert <- ps_sert

data$ipw_follow <- ipw_follow_trunc

data$ipw_sert <- ipw_sert_trunc

# Create strategy subsets

data_followers <- data[data$followed_rule == 1, ]

data_sertraline <- data[data$received_sertraline == 1, ]

if (verbose) {

cat("Followers:", nrow(data_followers), "\n")

cat("Sertraline users:", nrow(data_sertraline), "\n")

cat("Weight truncation threshold (followers):", round(threshold_follow, 4), "\n")

cat("Weight truncation threshold (sertraline):", round(threshold_sert, 4), "\n")

}

# Optional plotting

if (plot_ps_dist) {

par(mfrow = c(1, 2))

hist(ps_follow, main = "PS: Following Rule", xlab = "Propensity Score")

hist(ps_sert, main = "PS: Receiving Sertraline", xlab = "Propensity Score")

par(mfrow = c(1, 1))

}

if (plot_weight_dist) {

par(mfrow = c(1, 2))

hist(ipw_follow_trunc[ipw_follow_trunc > 0],

main = "Truncated Weights: Followers", xlab = "Weight")

hist(ipw_sert_trunc[ipw_sert_trunc > 0],

main = "Truncated Weights: Sertraline", xlab = "Weight")

par(mfrow = c(1, 1))

}

return(list(

data = data,

data_followers = data_followers,

data_sertraline = data_sertraline,

ps_model_follow = ps_model_follow,

ps_model_sert = ps_model_sert

))

}

assess_covariate_balance <- function(data, confounders, weight_var, group_var,

target_smd = 0.1, verbose = FALSE) {

# Calculates standardized mean differences to assess covariate balance

smd_results <- data.frame(

covariate = character(),

smd_unweighted = numeric(),

smd_weighted = numeric(),

balanced = logical(),

stringsAsFactors = FALSE

)

for (cov in confounders) {

# Unweighted SMD

tab_unwt <- CreateTableOne(

vars = cov,

strata = group_var,

data = data,

test = FALSE

)

smd_unwt <- abs(as.numeric(ExtractSmd(tab_unwt)[1]))

# Weighted SMD

tab_wt <- CreateTableOne(

vars = cov,

strata = group_var,

data = data,

weights = weight_var,

test = FALSE

)

smd_wt <- abs(as.numeric(ExtractSmd(tab_wt)[1]))

smd_results <- rbind(smd_results, data.frame(

covariate = cov,

smd_unweighted = smd_unwt,

smd_weighted = smd_wt,

balanced = smd_wt < target_smd

))

}

if (verbose) {

cat("\nCovariate Balance Assessment:\n")

cat("Balanced covariates:", sum(smd_results$balanced), "/", nrow(smd_results), "\n")

if (any(!smd_results$balanced)) {

cat("Unbalanced covariates:\n")

print(smd_results[!smd_results$balanced, ])

}

}

return(smd_results)

}

#-------------------------------------------------------------------------------

# 6.3 Strategy Comparison Functions

#-------------------------------------------------------------------------------

estimate_strategy_outcomes <- function(data_followers, data_sertraline,

data_full, time_var, outcome_event_var,

competing_event_var, confounders,

time_grid, smd_threshold = 0.1,

verbose = FALSE) {

# Estimates cumulative incidence under each treatment strategy

# Check covariate balance

data_combined <- rbind(

data_followers %>% mutate(strategy = "follower"),

data_sertraline %>% mutate(strategy = "sertraline")

)

smd_follow <- assess_covariate_balance(

data = data_combined,

confounders = confounders,

weight_var = "ipw_follow",

group_var = "strategy",

target_smd = smd_threshold,

verbose = verbose

)

smd_sert <- assess_covariate_balance(

data = data_combined,

confounders = confounders,

weight_var = "ipw_sert",

group_var = "strategy",

target_smd = smd_threshold,

verbose = verbose

)

# Determine if covariate adjustment needed

unbalanced_follow <- smd_follow$covariate[!smd_follow$balanced]

unbalanced_sert <- smd_sert$covariate[!smd_sert$balanced]

unbalanced_covs <- unique(c(unbalanced_follow, unbalanced_sert))

adjust_formula <- if (length(unbalanced_covs) > 0) {

paste("+", paste(unbalanced_covs, collapse = " + "))

} else {

""

}

# Fit weighted Aalen-Johansen models

formula_follow <- as.formula(

paste0("Hist(", time_var, ", ", "cens_event_combined) ~ 1", adjust_formula)

)

aj_model_follow <- CSC(

formula = formula_follow,

data = data_followers,

weights = data_followers$ipw_follow,

cause = 1

)

aj_model_sert <- CSC(

formula = formula_follow,

data = data_sertraline,

weights = data_sertraline$ipw_sert,

cause = 1

)

# Predict on full sample

pred_follow <- predictRisk(

aj_model_follow,

newdata = data_full,

times = time_grid,

cause = 1

)

pred_sert <- predictRisk(

aj_model_sert,

newdata = data_full,

times = time_grid,

cause = 1

)

# Calculate population-level risks

risk_trajectory_follow <- colMeans(pred_follow, na.rm = TRUE)

risk_trajectory_sert <- colMeans(pred_sert, na.rm = TRUE)

# Extract 2-year risk

idx_2year <- which.min(abs(time_grid - 730))

risk_2year_follow <- risk_trajectory_follow[idx_2year]

risk_2year_sert <- risk_trajectory_sert[idx_2year]

# Calculate contrasts

risk_diff <- risk_2year_sert - risk_2year_follow

risk_ratio <- risk_2year_sert / risk_2year_follow

nnt <- 1 / abs(risk_diff)

return(list(

risk_2year_follower = risk_2year_follow * 100,

risk_2year_sertraline = risk_2year_sert * 100,

risk_difference = risk_diff * 100,

risk_ratio = risk_ratio,

nnt = nnt,

trajectory_follower = risk_trajectory_follow * 100,

trajectory_sertraline = risk_trajectory_sert * 100,

time_grid = time_grid,

n_followers = nrow(data_followers),

n_sertraline = nrow(data_sertraline),

unbalanced_covariates = unbalanced_covs

))

}

#-------------------------------------------------------------------------------

# 6.4 Temporal Cross-Validation Functions

#-------------------------------------------------------------------------------

temporal_cv_analysis <- function(data, periods, time_var, outcome_event_var,

competing_event_var, cens_event_comb_var,

treatment_var, confounders, prediction_time,

alpha, nfolds, verbose = FALSE) {

# Implements expanding window temporal cross-validation

results_list <- list()

period_labels <- levels(data[[periods]])

n_periods <- length(period_labels)

for (fold in 1:(n_periods - 1)) {

if (verbose) {

cat("\n=== Fold", fold, "===\n")

cat("Training periods:", paste(period_labels[1:fold], collapse = ", "), "\n")

cat("Validation period:", period_labels[fold + 1], "\n")

}

# Split data

train_data <- data[data[[periods]] %in% period_labels[1:fold], ]

test_data <- data[data[[periods]] == period_labels[fold + 1], ]

# Fit ITE models

ite_models <- fit_ite_models(

train_data = train_data,

test_data = test_data,

time_var = time_var,

outcome_event_var = outcome_event_var,

competing_event_var = competing_event_var,

cens_event_comb_var = cens_event_comb_var,

treatment_var = treatment_var,

confounders = confounders,

prediction_time = prediction_time,

alpha = alpha,

nfolds = nfolds,

verbose = verbose

)

# Determine optimal treatment and concordance

test_data$optimal_tx <- ite_models$treatment_levels[

apply(ite_models$risk_predictions, 1, which.min)

]

test_data$concordance <- as.numeric(

test_data[[treatment_var]] == test_data$optimal_tx

)

# Evaluate decision accuracy

formula_decision <- as.formula(

paste0(

"Surv(", time_var, ", ", outcome_event_var, ") ~ concordance + ",

paste(confounders, collapse = " + ")

)

)

# Outcome model

outcome_model_decision <- fit_outcome_model(

data = test_data,

time_var = time_var,

outcome_event_var = outcome_event_var,

treatment_var = "concordance",

confounders = confounders,

alpha = alpha,

nfolds = nfolds,

verbose = FALSE

)

# Competing risk model

competing_model_decision <- fit_competing_model(

data = test_data,

time_var = time_var,

competing_event_var = competing_event_var,

treatment_var = "concordance",

confounders = confounders,

verbose = FALSE

)

# Estimate decision accuracy benefit

test_data_concordant <- test_data

test_data_concordant$concordance <- 1

test_data_discordant <- test_data

test_data_discordant$concordance <- 0

risk_concordant <- predictRisk(

object = list(

Cause1 = outcome_model_decision$coxph_model,

Cause2 = competing_model_decision

),

newdata = test_data_concordant,

times = prediction_time,

cause = 1,

product.limit = TRUE

)

risk_discordant <- predictRisk(

object = list(

Cause1 = outcome_model_decision$coxph_model,

Cause2 = competing_model_decision

),

newdata = test_data_discordant,

times = prediction_time,

cause = 1,

product.limit = TRUE

)

# Population benefit

mean_risk_concordant <- mean(risk_concordant, na.rm = TRUE)

mean_risk_discordant <- mean(risk_discordant, na.rm = TRUE)

risk_difference <- (mean_risk_discordant - mean_risk_concordant) * 100

# Bootstrap CI for risk difference

n_boot_cv <- 1000

boot_rd <- replicate(n_boot_cv, {

idx <- sample(nrow(test_data), replace = TRUE)

mean(risk_discordant[idx], na.rm = TRUE) - mean(risk_concordant[idx], na.rm = TRUE)

}) * 100

rd_ci <- quantile(boot_rd, probs = c(0.025, 0.975))

results_list[[fold]] <- list(

fold = fold,

training_periods = paste(period_labels[1:fold], collapse = ", "),

validation_period = period_labels[fold + 1],

n_train = nrow(train_data),

n_test = nrow(test_data),

n_concordant = sum(test_data$concordance),

percent_concordant = mean(test_data$concordance) * 100,

risk_difference = risk_difference,

rd_lower = rd_ci[1],

rd_upper = rd_ci[2]

)

if (verbose) {

cat("Concordant patients:", sum(test_data$concordance), "/", nrow(test_data),

sprintf("(%.1f%%)\n", mean(test_data$concordance) * 100))

cat(sprintf("Risk difference: %.2f%% (95%% CI: %.2f, %.2f)\n",

risk_difference, rd_ci[1], rd_ci[2]))

}

}

return(results_list)

}

meta_analyze_cv_results <- function(cv_results) {

# Performs random-effects meta-analysis on cross-validation results

results_df <- do.call(rbind, lapply(cv_results, function(x) {

data.frame(

fold = x$fold,

estimate = x$risk_difference,

lower = x$rd_lower,

upper = x$rd_upper,

se = (x$rd_upper - x$rd_lower) / (2 * 1.96)

)

}))

meta_model <- metagen(

TE = results_df$estimate,

seTE = results_df$se,

studlab = paste("Fold", results_df$fold),

sm = "RD",

fixed = FALSE,

random = TRUE,

method.tau = "REML",

hakn = TRUE

)

return(list(

results_df = results_df,

meta_model = meta_model

))

}

#-------------------------------------------------------------------------------

# 6.5 Bootstrap Functions

#-------------------------------------------------------------------------------

run_bootstrap_iteration <- function(data, treatment_var, time_var,

outcome_event_var, competing_event_var,

cens_event_comb_var, confounders,

prediction_time, alpha, nfolds,

fit_ite_function, fit_ps_function,

weight_truncate, time_grid, boot_iter,

verbose = FALSE) {

# Single bootstrap iteration for strategy comparison

if (verbose) {

cat("\n--- Bootstrap Iteration", boot_iter, "---\n")

}

# Bootstrap resample

boot_indices <- sample(nrow(data), replace = TRUE)

boot_data <- data[boot_indices, ]

# Fit ITE models

ite_models <- fit_ite_function(

train_data = boot_data,

test_data = boot_data,

time_var = time_var,

outcome_event_var = outcome_event_var,

competing_event_var = competing_event_var,

cens_event_comb_var = cens_event_comb_var,

treatment_var = treatment_var,

confounders = confounders,

prediction_time = prediction_time,

alpha = alpha,

nfolds = nfolds,

verbose = FALSE

)

# Determine optimal treatments

boot_data$optimal_tx <- ite_models$treatment_levels[

apply(ite_models$risk_predictions, 1, which.min)

]

boot_data$followed_rule <- as.numeric(

boot_data[[treatment_var]] == boot_data$optimal_tx

)

boot_data$received_sertraline <- as.numeric(

boot_data[[treatment_var]] == "sertraline"

)

# Fit propensity scores

ps_results <- fit_ps_function(

data = boot_data,

confounders = confounders,

truncate_percentile = weight_truncate,

plot_ps_dist = FALSE,

plot_weight_dist = FALSE,

verbose = FALSE

)

# Estimate strategy outcomes

strategy_results <- estimate_strategy_outcomes(

data_followers = ps_results$data_followers,

data_sertraline = ps_results$data_sertraline,

data_full = boot_data,

time_var = time_var,

outcome_event_var = outcome_event_var,

competing_event_var = competing_event_var,

confounders = confounders,

time_grid = time_grid,

verbose = FALSE

)

# Treatment distribution

tx_dist <- table(boot_data$optimal_tx) / nrow(boot_data) * 100

return(list(

summary_stats = data.frame(

iteration = boot_iter,

n_total = nrow(boot_data),

n_followers = strategy_results$n_followers,

pct_followers = strategy_results$n_followers / nrow(boot_data) * 100,

n_sertraline = strategy_results$n_sertraline,

pct_sertraline = strategy_results$n_sertraline / nrow(boot_data) * 100,

risk_2yr_follower = strategy_results$risk_2year_follower,

risk_2yr_sertraline = strategy_results$risk_2year_sertraline,

risk_difference = strategy_results$risk_difference,

risk_ratio = strategy_results$risk_ratio,

nnt = strategy_results$nnt,

pct_citalopram = as.numeric(tx_dist["citalopram"]),

pct_sertraline_rec = as.numeric(tx_dist["sertraline"]),

pct_venlafaxine = as.numeric(tx_dist["venlafaxine"]),

pct_mirtazapine = as.numeric(tx_dist["mirtazapine"])

),

trajectory = data.frame(

iteration = boot_iter,

time = strategy_results$time_grid,

risk_follower = strategy_results$trajectory_follower,

risk_sertraline = strategy_results$trajectory_sertraline

)

))

}

summarize_bootstrap <- function(summary_table) {

# Summarizes bootstrap results with means, medians, and percentiles

numeric_cols <- sapply(summary_table, is.numeric)

numeric_cols <- names(numeric_cols)[numeric_cols & names(numeric_cols) != "iteration"]

summary_stats <- data.frame(

metric = numeric_cols,

mean = sapply(numeric_cols, function(x) mean(summary_table[[x]], na.rm = TRUE)),

ci_lower = sapply(numeric_cols, function(x) quantile(summary_table[[x]], 0.025, na.rm = TRUE)),

ci_upper = sapply(numeric_cols, function(x) quantile(summary_table[[x]], 0.975, na.rm = TRUE)),

median = sapply(numeric_cols, function(x) median(summary_table[[x]], na.rm = TRUE)),

p2.5 = sapply(numeric_cols, function(x) quantile(summary_table[[x]], 0.025, na.rm = TRUE)),

p97.5 = sapply(numeric_cols, function(x) quantile(summary_table[[x]], 0.975, na.rm = TRUE))

)

rownames(summary_stats) <- NULL

return(summary_stats)

}

plot_bootstrap_curves <- function(trajectory_table) {

# Plots cumulative incidence curves from bootstrap iterations

# Calculate mean trajectories

mean_trajectories <- trajectory_table %>%

group_by(time) %>%

summarize(

mean_follower = mean(risk_follower, na.rm = TRUE),

mean_sertraline = mean(risk_sertraline, na.rm = TRUE)

)

# Create plot

p <- ggplot() +

geom_line(

data = trajectory_table,

aes(x = time / 30, y = risk_follower, group = iteration),

alpha = 0.1, color = "blue"

) +

geom_line(

data = trajectory_table,

aes(x = time / 30, y = risk_sertraline, group = iteration),

alpha = 0.1, color = "red"

) +

geom_line(

data = mean_trajectories,

aes(x = time / 30, y = mean_follower),

color = "blue", size = 1.5

) +

geom_line(

data = mean_trajectories,

aes(x = time / 30, y = mean_sertraline),

color = "red", size = 1.5

) +

labs(

x = "Time (months)",

y = "Cumulative Incidence (%)",

title = "Cumulative Incidence of Non-Response"

) +

theme_minimal() +

theme(

plot.title = element_text(hjust = 0.5, size = 14, face = "bold"),

axis.title = element_text(size = 12),

axis.text = element_text(size = 10)

)

return(p)

}

#===============================================================================

# 7. PHASE 1: TEMPORAL CROSS-VALIDATION

#===============================================================================

cat("\n=======================================================\n")

cat("PHASE 1: TEMPORAL CROSS-VALIDATION\n")

cat("=======================================================\n")

# Run temporal cross-validation

cv_results <- temporal_cv_analysis(

data = analysis4,

periods = "index_periods",

time_var = time_var,

outcome_event_var = outcome_event_var,

competing_event_var = competing_event_var,

cens_event_comb_var = cens_event_comb_var,

treatment_var = treatment_var,

confounders = confounders,

prediction_time = max_time,

alpha = alpha,

nfolds = nfolds,

verbose = TRUE

)

# Meta-analyze results

meta_results <- meta_analyze_cv_results(cv_results)

# Print meta-analysis summary

cat("\n--- Meta-Analysis Summary ---\n")

print(meta_results$meta_model)

# Save results

write.xlsx(

meta_results$results_df,

file.path(results_path, "phase1_cv_results.xlsx"),

rowNames = FALSE

)

# Plot forest plot

pdf(file.path(results_path, "phase1_forest_plot.pdf"), width = 10, height = 6)

forest(meta_results$meta_model,

xlab = "Risk Difference (%)",

leftcols = "studlab",

leftlabs = "Fold")

dev.off()

cat("\nPhase 1 completed. Results saved.\n")

#===============================================================================

# 8. PHASE 2: BOOTSTRAP STRATEGY COMPARISON

#===============================================================================

cat("\n=======================================================\n")

cat("PHASE 2: BOOTSTRAP STRATEGY COMPARISON\n")

cat("=======================================================\n")

# Set up parallel processing

plan(multisession, workers = n_cores)

# Run bootstrap analysis with progress bar

boot_results <- with_progress({

p <- progressor(steps = n_boot)

future_map(1:n_boot, function(i) {

result <- tryCatch({

run_bootstrap_iteration(

data = analysis4,

treatment_var = treatment_var,

time_var = time_var,

outcome_event_var = outcome_event_var,

competing_event_var = competing_event_var,

cens_event_comb_var = cens_event_comb_var,

confounders = confounders,

prediction_time = max_time,

alpha = alpha,

nfolds = nfolds,

fit_ite_function = fit_ite_models,

fit_ps_function = fit_ps_and_truncate,

weight_truncate = weight_truncate,

time_grid = time_grid,

boot_iter = i,

verbose = FALSE

)

}, error = function(e) {

cat("\n++++++++++ Iteration", i, "failed. Error:", e$message, "+++++++++\n")

return(NULL)

})

p() # Update progress bar

return(result)

}, .options = furrr_options(seed = TRUE))

})

# Compile results

summary_table <- do.call(rbind, lapply(boot_results, function(x) x$summary_stats))

trajectory_table <- do.call(rbind, lapply(boot_results, function(x) x$trajectory))

# Calculate summary statistics

summary_stats <- summarize_bootstrap(summary_table)

# Plot trajectories

p <- plot_bootstrap_curves(trajectory_table)

# Save results

timestamp <- format(Sys.time(), "%Y%m%d_%H%M%S")

write.xlsx(

summary_stats,

file.path(results_path, paste0("phase2_bootstrap_summary_", timestamp, ".xlsx")),

rowNames = FALSE

)

write.xlsx(

summary_table,

file.path(results_path, paste0("phase2_bootstrap_iterations_", timestamp, ".xlsx")),

rowNames = FALSE

)

write.xlsx(

trajectory_table,

file.path(results_path, paste0("phase2_bootstrap_trajectories_", timestamp, ".xlsx")),

rowNames = FALSE

)

ggsave(

filename = file.path(results_path, paste0("phase2_trajectory_plot_", timestamp, ".pdf")),

plot = p,

width = 10,

height = 6

)

saveRDS(

list(

summary_table = summary_table,

trajectory_table = trajectory_table,

completed_iterations = nrow(summary_table)

),

file = file.path(results_path, paste0("phase2_bootstrap_results_", timestamp, ".rds"))

)

cat("\nPhase 2 completed. Results saved.\n")

cat("Completed iterations:", nrow(summary_table), "/", n_boot, "\n")

#===============================================================================

# 9. SUPPLEMENTARY DESCRIPTIVE ANALYSES

#===============================================================================

cat("\n=======================================================\n")

cat("SUPPLEMENTARY ANALYSES\n")

cat("=======================================================\n")

#-------------------------------------------------------------------------------

# 9.1 Baseline Characteristics by Treatment

#-------------------------------------------------------------------------------

cat("\n--- Table 1: Baseline Characteristics by Treatment ---\n")

cat_vars <- c(tolower(confounder_medical), "sex")

tab1_treatment <- CreateTableOne(

vars = c(confounders, "index_year"),

strata = "treatment",

data = analysis4,

factorVars = cat_vars,

includeNA = FALSE,

test = TRUE

)

write.csv(

print(tab1_treatment, nonnormal = c("age_index", "index_year")),

file = paste0(results_path, "table1_treatment_groups.csv")

)

#-------------------------------------------------------------------------------

# 9.2 Strategy Comparison Descriptives

#-------------------------------------------------------------------------------

cat("\n--- Analyzing Strategy Populations ---\n")

# Fit ITE models on full data

ite_full <- fit_ite_models(

train_data = analysis4,

test_data = analysis4,

time_var = time_var,

outcome_event_var = outcome_event_var,

competing_event_var = competing_event_var,

cens_event_comb_var = cens_event_comb_var,

treatment_var = treatment_var,

confounders = confounders,

prediction_time = max_time,

alpha = alpha,

nfolds = nfolds,

verbose = TRUE

)

# Create strategy indicators

analysis4_strategies <- analysis4 %>%

mutate(

optimal_tx = ite_full$treatment_levels[apply(ite_full$risk_predictions, 1, which.min)],

should_receive_personalized = optimal_tx,

should_receive_sertraline = "sertraline",

followed_rule = as.numeric(treatment == optimal_tx),

received_sertraline = as.numeric(treatment == "sertraline")

)

# Optimal treatment distribution

optimal_treatment_dist <- table(analysis4_strategies$should_receive_personalized)

write.csv(

optimal_treatment_dist,

file = paste0(results_path, "optimal_treatment_distribution.csv")

)

cat("\nOptimal treatment distribution:\n")

print(optimal_treatment_dist)

# Risk summaries by treatment

risk_summary <- data.frame(

treatment = ite_full$treatment_levels,

mean_risk = colMeans(ite_full$risk_predictions, na.rm = TRUE),

sd_risk = apply(ite_full$risk_predictions, 2, sd, na.rm = TRUE)

)

event_summary <- aggregate(

analysis4_strategies$cens_event_combined,

by = list(treatment = analysis4_strategies$treatment),

FUN = function(x) c(

n_patients = length(x),

outcome_events = sum(x == 1, na.rm = TRUE),

competing_events = sum(x == 2, na.rm = TRUE),

admin_cens = sum(x == 0, na.rm = TRUE)

)

)

event_summary <- do.call(data.frame, event_summary)

event_risk_per_treat <- merge(event_summary, risk_summary, by = "treatment", all.x = TRUE)

write.csv(

event_risk_per_treat,

file = paste0(results_path, "risk_summary_by_treatment.csv"),

row.names = FALSE

)

#-------------------------------------------------------------------------------

# 9.3 Model Coefficients

#-------------------------------------------------------------------------------

cat("\n--- Extracting Model Coefficients ---\n")

# Outcome model coefficients

outcome_coefs <- data.frame(

coefficient = names(coef(ite_full$outcome_model_coxph_penalized)),

value = as.vector(coef(ite_full$outcome_model_coxph_penalized))

)

baseline_hazard_outcome <- last(basehaz(ite_full$outcome_model_coxph_penalized))

outcome_coefs <- rbind(

outcome_coefs,

data.frame(

coefficient = "baseline_hazard",

value = baseline_hazard_outcome$hazard

)

)

# Competing risk model coefficients

competing_coefs <- data.frame(

coefficient = names(coef(ite_full$competing_model)),

value = as.vector(coef(ite_full$competing_model))

)

baseline_hazard_competing <- last(basehaz(ite_full$competing_model))

competing_coefs <- rbind(

competing_coefs,

data.frame(

coefficient = "baseline_hazard",

value = baseline_hazard_competing$hazard

)

)

write.xlsx(

outcome_coefs,

file.path(results_path, "model_coefficients_outcome.xlsx"),

rowNames = FALSE

)

write.xlsx(

competing_coefs,

file.path(results_path, "model_coefficients_competing.xlsx"),

rowNames = FALSE

)

#-------------------------------------------------------------------------------

# 9.4 Propensity Score Assessment

#-------------------------------------------------------------------------------

cat("\n--- Propensity Score Analysis ---\n")

ps_results <- fit_ps_and_truncate(

data = analysis4_strategies,

confounders = confounders,

truncate_percentile = weight_truncate,

plot_ps_dist = TRUE,

plot_weight_dist = TRUE,

verbose = TRUE

)

# Save propensity score plots

pdf(file.path(results_path, "propensity_score_distributions.pdf"), width = 12, height = 6)

par(mfrow = c(1, 2))

hist(ps_results$data$ps_follow,

main = "Propensity Score: Following Rule",

xlab = "Propensity Score",

col = "lightblue")

hist(ps_results$data$ps_sert,

main = "Propensity Score: Receiving Sertraline",

xlab = "Propensity Score",

col = "lightcoral")

dev.off()

pdf(file.path(results_path, "ipw_weight_distributions.pdf"), width = 12, height = 6)

par(mfrow = c(1, 2))

hist(ps_results$data$ipw_follow[ps_results$data$ipw_follow > 0],

main = "IPW Weights: Followers",

xlab = "Weight",

col = "lightblue")

hist(ps_results$data$ipw_sert[ps_results$data$ipw_sert > 0],

main = "IPW Weights: Sertraline Users",

xlab = "Weight",

col = "lightcoral")

dev.off()

#-------------------------------------------------------------------------------

# 9.5 Baseline Characteristics by Strategy

#-------------------------------------------------------------------------------

cat("\n--- Table 1: Baseline Characteristics by Strategy ---\n")

# Combine strategy populations

data_followers <- ps_results$data_followers

data_sertraline <- ps_results$data_sertraline

cols_keep <- setdiff(colnames(data_followers), c("ipw_follow", "ipw_sert"))

df <- data_followers[, cols_keep]

df$strategy <- factor("Follower", levels = c("Sertraline", "Follower"))

ds <- data_sertraline[, cols_keep]

ds$strategy <- factor("Sertraline", levels = c("Sertraline", "Follower"))

data_strategies <- rbind(df, ds)

tab1_strategy <- CreateTableOne(

vars = c(confounders, "index_year"),

strata = "strategy",

data = data_strategies,

factorVars = cat_vars,

includeNA = FALSE,

test = TRUE

)

write.csv(

print(tab1_strategy, nonnormal = c("age_index", "index_year")),

file = paste0(results_path, "table1_treatment_strategies.csv")

)

#===============================================================================

# 10. ANALYSIS COMPLETE

#===============================================================================

cat("\n=======================================================\n")

cat("ANALYSIS COMPLETE\n")

cat("=======================================================\n")

cat("\nAll results have been saved to:", results_path, "\n")

cat("\nSession info:\n")

print(sessionInfo())
